# Supplementary material for: Interfacial Janus gold nanoclusters as excellent phase- and orientation-specific dopamine sensors
Source: Royal Society of Chemistry journal article supplement (doi:10.1039/c2an35964b), 2012-01-01
Supplement: c2an35964b.pdf [file c2an35964b.pdf]

## Supporting Information

# Interfacial Janus Gold Nanoclusters as Excellent Phase and Orientation-Specific Dopamine Sensors

Biji P,<sup>a,b</sup> and Archita Patnaik<sup>\*,a</sup>

<sup>a</sup> Department of Chemistry, Indian Institute of Technology, Madras Chennai-600 036, INDIA

<sup>b</sup> PSG Institute of Advanced Studies, Coimbatore-641 004, INDIA

[archita59@yahoo.com](mailto:archita59@yahoo.com)

(S1)

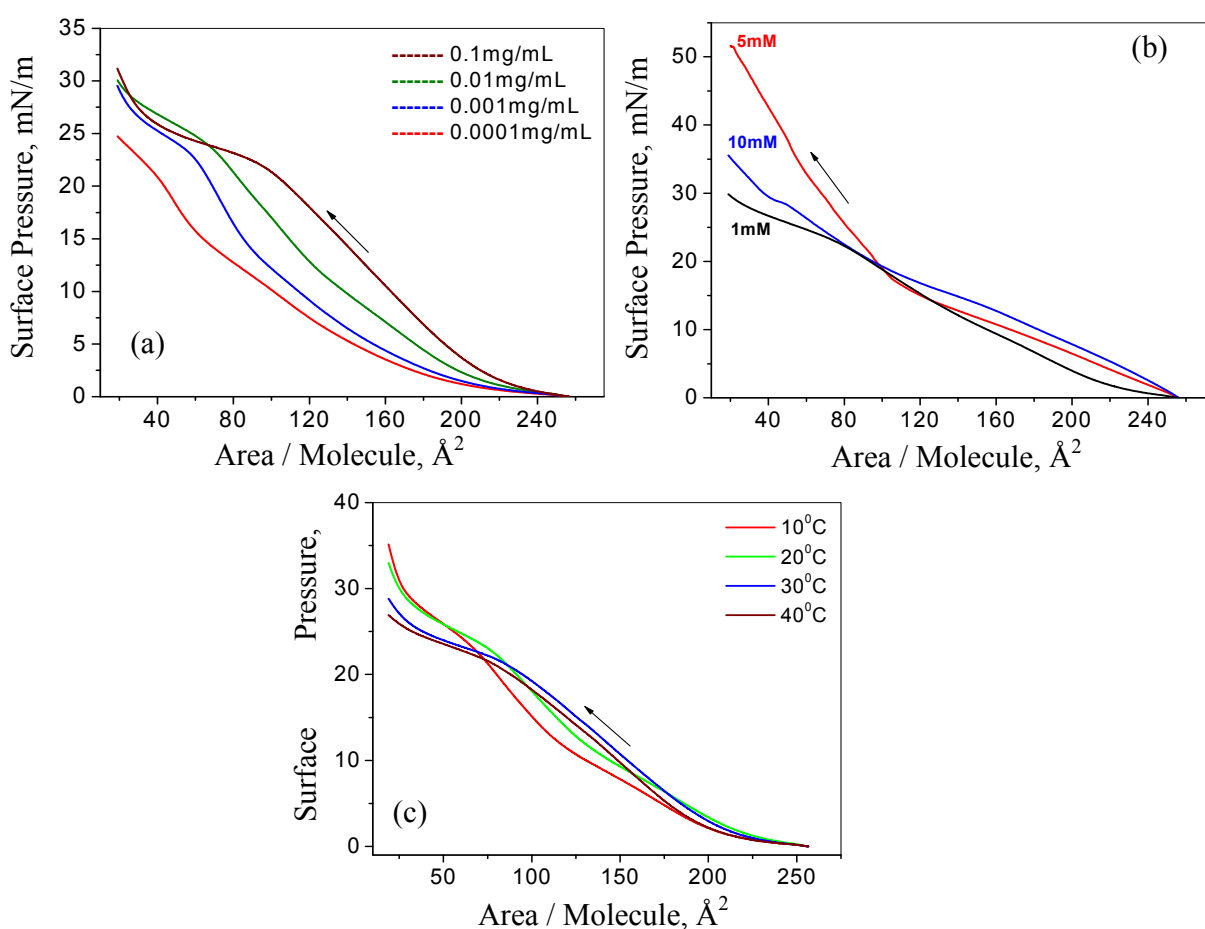

**Figure S2.** 2D phase characteristics of (a)  $1 \times 10^{-3}$  M  $TOA^+ - AuCl_4^-$  as a function of subphase tryptophan concentration, (b) as a function of precursor concentration and (c)  $1 \times 10^{-3}$  M  $TOA^+ - AuCl_4^-$  complex as a function of temperature at a tryptophan subphase concentration 0.01 mg/L.
